# Supplementary material for: Electrophysiological correlates of focused attention on low- and high-distressed tinnitus
Source: PubMed Central journal article supplement (PMC7406215; doi:10.1371/journal.pone.0236521), 2020-08-05
Supplement: pone.0236521.s001.pdf [file pone.0236521.s001.pdf]

S1 Table. The mean absolute power and standard error (in brackets) values for different frequency bands in the contrast: body focus condition (BFC) versus tinnitus focus condition (TFC), calculated in each cluster for the whole study sample (n=67).

|            |    | BFC                  | TFC                  |             |    | BFC                  | TFC                  |
|------------|----|----------------------|----------------------|-------------|----|----------------------|----------------------|
| Delta      | LA | <b>0.943 (0.020)</b> | <b>0.972 (0.022)</b> | Low Beta    | LA | 0.356 (0.029)        | 0.353 (0.028)        |
|            | RA | 0.964 (0.020)        | 0.984 (0.021)        |             | RA | 0.364 (0.030)        | 0.362 (0.029)        |
|            | LM | 0.882 (0.017)        | 0.893 (0.017)        |             | LM | 0.466 (0.032)        | 0.466 (0.031)        |
|            | RM | 0.899 (0.019)        | 0.904 (0.019)        |             | RM | 0.464 (0.033)        | 0.456 (0.033)        |
|            | CE | 1.055 (0.018)        | 1.050 (0.018)        |             | CE | 0.590 (0.035)        | 0.585 (0.033)        |
|            | LP | 0.920 (0.020)        | 0.926 (0.020)        |             | LP | 0.628 (0.039)        | 0.612 (0.038)        |
|            | RP | 0.913 (0.022)        | 0.913 (0.021)        |             | RP | 0.628 (0.041)        | 0.617 (0.040)        |
| Theta      | LA | 0.778 (0.024)        | 0.777 (0.024)        | Middle Beta | LA | 0.258 (0.028)        | 0.246 (0.028)        |
|            | RA | 0.800 (0.024)        | 0.797 (0.025)        |             | RA | 0.253 (0.029)        | 0.254 (0.028)        |
|            | LM | 0.750 (0.023)        | 0.744 (0.023)        |             | LM | 0.364 (0.032)        | 0.349 (0.033)        |
|            | RM | 0.762 (0.024)        | 0.759 (0.025)        |             | RM | 0.350 (0.034)        | 0.345 (0.034)        |
|            | CE | 0.969 (0.024)        | 0.962 (0.025)        |             | CE | 0.436 (0.033)        | 0.430 (0.032)        |
|            | LP | 0.803 (0.026)        | 0.800 (0.026)        |             | LP | 0.407 (0.034)        | 0.401 (0.033)        |
|            | RP | 0.782 (0.028)        | 0.780 (0.028)        |             | RP | 0.395 (0.035)        | 0.387 (0.033)        |
| Low Alpha  | LA | 0.669 (0.047)        | 0.650 (0.048)        | High Beta   | LA | 0.508 (0.028)        | 0.481 (0.026)        |
|            | RA | 0.702 (0.048)        | 0.684 (0.050)        |             | RA | 0.478 (0.026)        | 0.484 (0.026)        |
|            | LM | 0.665 (0.050)        | 0.646 (0.050)        |             | LM | 0.579 (0.03)         | 0.558 (0.031)        |
|            | RM | 0.687 (0.051)        | 0.670 (0.052)        |             | RM | 0.547 (0.028)        | 0.545 (0.029)        |
|            | CE | 0.896 (0.052)        | 0.881 (0.052)        |             | CE | 0.633 (0.027)        | 0.620 (0.025)        |
|            | LP | 0.842 (0.055)        | 0.823 (0.057)        |             | LP | 0.592 (0.028)        | 0.574 (0.026)        |
|            | RP | 0.838 (0.058)        | 0.825 (0.061)        |             | RP | 0.580 (0.029)        | 0.566 (0.028)        |
| High Alpha | LA | 0.551 (0.044)        | 0.524 (0.041)        | Gamma       | LA | 0.282 (0.039)        | 0.284 (0.036)        |
|            | RA | 0.573 (0.045)        | 0.541 (0.043)        |             | RA | <b>0.223 (0.033)</b> | <b>0.269 (0.034)</b> |
|            | LM | 0.622 (0.046)        | 0.598 (0.043)        |             | LM | 0.335 (0.041)        | 0.314 (0.045)        |
|            | RM | 0.626 (0.048)        | 0.598 (0.046)        |             | RM | 0.295 (0.036)        | 0.282 (0.039)        |
|            | CE | 0.854 (0.053)        | 0.819 (0.049)        |             | CE | 0.264 (0.032)        | 0.253 (0.033)        |
|            | LP | 0.961 (0.061)        | 0.917 (0.059)        |             | LP | 0.213 (0.026)        | 0.215 (0.027)        |
|            | RP | 0.981 (0.065)        | 0.938 (0.061)        |             | RP | 0.220 (0.028)        | 0.214 (0.031)        |

LA – left anterior; RA – right anterior; LM – left middle; RM – right middle; CE – central; LP – left posterior; RP – right posterior. Bolded values mark the means statistically different at the  $p < 0.05$  level. Items in bold are significant based on p-values.
