# Supplementary material for: Electrophysiological correlates of focused attention on low- and high-distressed tinnitus
Source: PubMed Central journal article supplement (PMC7406215; doi:10.1371/journal.pone.0236521), 2020-08-05
Supplement: pone.0236521.s002.pdf [file pone.0236521.s002.pdf]

S2 Table. Post-hoc pairwise t-tests results for the contrast: body focus condition (BFC) versus tinnitus focus condition (TFC) calculated in each cluster for the whole study sample (n=67). Items in bold are significant based on p-values.

|            |    | M <sub>Diff</sub> | CI     |        | p-value         | FDR-adjusted p-value |             |    | M <sub>Diff</sub> | CI     |        | p-value         | FDR-adjusted p-value |
|------------|----|-------------------|--------|--------|-----------------|----------------------|-------------|----|-------------------|--------|--------|-----------------|----------------------|
|            |    |                   | L      | U      |                 |                      |             |    |                   | L      | U      |                 |                      |
| Delta      | LA | -0.029            | -0.053 | -0.006 | <b>0.015</b> ** | 0.409                | Low Beta    | LA | 0.003             | -0.019 | 0.026  | 0.795           | 0.980                |
|            | RA | -0.019            | -0.042 | 0.004  | 0.106           | 0.774                |             | RA | 0.002             | -0.019 | 0.024  | 0.856           | 0.981                |
|            | LM | -0.011            | -0.035 | 0.012  | 0.338           | 0.860                |             | LM | 0.000             | -0.024 | 0.024  | 0.979           | 0.985                |
|            | RM | -0.005            | -0.026 | 0.017  | 0.654           | 0.893                |             | RM | 0.008             | -0.013 | 0.029  | 0.473           | 0.893                |
|            | CE | 0.005             | -0.012 | 0.022  | 0.571           | 0.893                |             | CE | 0.005             | -0.021 | 0.031  | 0.734           | 0.979                |
|            | LP | -0.005            | -0.026 | 0.016  | 0.633           | 0.893                |             | LP | 0.016             | -0.011 | 0.046  | 0.241           | 0.819                |
|            | RP | 0.000             | -0.021 | 0.023  | 0.985           | 0.985                |             | RP | 0.011             | -0.019 | 0.043  | 0.509           | 0.893                |
| Theta      | LA | 0.001             | -0.018 | 0.020  | 0.937           | 0.981                | Middle Beta | LA | 0.012             | -0.015 | 0.041  | 0.397           | 0.893                |
|            | RA | 0.003             | -0.015 | 0.022  | 0.773           | 0.980                |             | RA | -0.001            | -0.023 | 0.020  | 0.905           | 0.981                |
|            | LM | 0.007             | -0.013 | 0.028  | 0.500           | 0.893                |             | LM | 0.016             | -0.009 | 0.041  | 0.217           | 0.819                |
|            | RM | 0.003             | -0.017 | 0.023  | 0.800           | 0.980                |             | RM | 0.005             | -0.017 | 0.028  | 0.644           | 0.893                |
|            | CE | 0.007             | -0.013 | 0.029  | 0.517           | 0.893                |             | CE | 0.006             | -0.014 | 0.025  | 0.579           | 0.893                |
|            | LP | 0.003             | -0.020 | 0.025  | 0.830           | 0.981                |             | LP | 0.006             | -0.014 | 0.026  | 0.611           | 0.893                |
|            | RP | 0.001             | -0.021 | 0.023  | 0.934           | 0.981                |             | RP | 0.007             | -0.016 | 0.031  | 0.539           | 0.893                |
| Low Alpha  | LA | 0.019             | -0.014 | 0.052  | 0.268           | 0.819                | High Beta   | LA | 0.027             | -0.006 | 0.064  | 0.108           | 0.774                |
|            | RA | 0.018             | -0.015 | 0.049  | 0.298           | 0.834                |             | RA | -0.006            | -0.031 | 0.018  | 0.643           | 0.893                |
|            | LM | 0.019             | -0.015 | 0.052  | 0.267           | 0.819                |             | LM | 0.021             | -0.010 | 0.054  | 0.194           | 0.819                |
|            | RM | 0.017             | -0.014 | 0.048  | 0.278           | 0.819                |             | RM | 0.002             | -0.025 | 0.029  | 0.890           | 0.981                |
|            | CE | 0.015             | -0.022 | 0.052  | 0.441           | 0.893                |             | CE | 0.013             | -0.006 | 0.033  | 0.196           | 0.819                |
|            | LP | 0.020             | -0.024 | 0.063  | 0.385           | 0.893                |             | LP | 0.018             | -0.005 | 0.045  | 0.133           | 0.774                |
|            | RP | 0.013             | -0.029 | 0.055  | 0.564           | 0.893                |             | RP | 0.015             | -0.015 | 0.043  | 0.320           | 0.853                |
| High Alpha | LA | 0.028             | -0.011 | 0.069  | 0.173           | 0.819                | Gamma       | LA | -0.002            | -0.051 | 0.048  | 0.946           | 0.981                |
|            | RA | 0.031             | -0.006 | 0.072  | 0.107           | 0.774                |             | RA | -0.046            | -0.083 | -0.011 | <b>0.012</b> ** | 0.409                |
|            | LM | 0.024             | -0.015 | 0.065  | 0.234           | 0.819                |             | LM | 0.020             | -0.038 | 0.079  | 0.491           | 0.893                |
|            | RM | 0.028             | -0.008 | 0.067  | 0.138           | 0.774                |             | RM | 0.013             | -0.036 | 0.062  | 0.619           | 0.893                |
|            | CE | 0.035             | -0.010 | 0.081  | 0.127           | 0.774                |             | CE | 0.011             | -0.023 | 0.052  | 0.596           | 0.893                |
|            | LP | 0.045             | -0.003 | 0.096  | 0.066           | 0.774                |             | LP | -0.001            | -0.040 | 0.039  | 0.936           | 0.981                |
|            | RP | 0.043             | -0.008 | 0.095  | 0.100           | 0.774                |             | RP | 0.005             | -0.040 | 0.049  | 0.805           | 0.980                |

M<sub>Diff</sub> – factor score mean difference; CI – 95% confidential interval; L – lower bound; U – upper bound; LA – left anterior; RA – right anterior; LM – left middle; RM – right middle; CE – central; LP – left posterior; RP – right posterior; LA – left anterior; RA – right anterior.
