# Supplementary material for: Electrophysiological correlates of focused attention on low- and high-distressed tinnitus
Source: PubMed Central journal article supplement (PMC7406215; doi:10.1371/journal.pone.0236521), 2020-08-05
Supplement: pone.0236521.s004.pdf [file pone.0236521.s004.pdf]

S4 Table. Post-hoc pairwise t-tests results for the contrast: body focus condition (BFC) versus tinnitus focus condition (TFC), calculated in each cluster separately for the high tinnitus-related distress (HD) and low tinnitus-related distress (LD) group. Items in bold are significant based on p-values.

|            |    | HD                |        |       |                |                      |             |    |                   |        |        |               |                      |
|------------|----|-------------------|--------|-------|----------------|----------------------|-------------|----|-------------------|--------|--------|---------------|----------------------|
|            |    | M <sub>Diff</sub> | CI     |       | p-value        | FDR-adjusted p-value |             |    | M <sub>Diff</sub> | CI     |        | p-value       | FDR-adjusted p-value |
|            |    |                   | L      | U     |                |                      |             |    |                   | L      | U      |               |                      |
| Delta      | LA | -0.022            | -0.053 | 0.012 | 0.186          | 0.800                | Low Beta    | LA | 0.000             | -0.030 | 0.028  | 0.989         | 0.993                |
|            | RA | -0.012            | -0.043 | 0.020 | 0.412          | 0.993                |             | RA | 0.006             | -0.020 | 0.032  | 0.713         | 0.993                |
|            | LM | -0.002            | -0.036 | 0.033 | 0.903          | 0.993                |             | LM | -0.002            | -0.041 | 0.033  | 0.899         | 0.993                |
|            | RM | -0.012            | -0.041 | 0.014 | 0.386          | 0.993                |             | RM | 0.020             | -0.007 | 0.046  | 0.130         | 0.765                |
|            | CE | 0.006             | -0.018 | 0.031 | 0.653          | 0.993                |             | CE | 0.020             | -0.014 | 0.052  | 0.224         | 0.864                |
|            | LP | -0.009            | -0.036 | 0.021 | 0.503          | 0.993                |             | LP | 0.025             | -0.008 | 0.057  | 0.150         | 0.765                |
|            | RP | -0.015            | -0.043 | 0.013 | 0.270          | 0.958                |             | RP | 0.020             | -0.018 | 0.061  | 0.314         | 0.993                |
| Theta      | LA | 0.009             | -0.018 | 0.034 | 0.466          | 0.993                | Middle Beta | LA | 0.015             | -0.021 | 0.063  | 0.527         | 0.993                |
|            | RA | 0.013             | -0.013 | 0.038 | 0.306          | 0.993                |             | RA | -0.003            | -0.026 | 0.021  | 0.781         | 0.993                |
|            | LM | 0.012             | -0.016 | 0.038 | 0.410          | 0.993                |             | LM | 0.026             | -0.009 | 0.063  | 0.148         | 0.765                |
|            | RM | 0.003             | -0.026 | 0.031 | 0.857          | 0.993                |             | RM | 0.010             | -0.016 | 0.037  | 0.442         | 0.993                |
|            | CE | 0.011             | -0.017 | 0.036 | 0.414          | 0.993                |             | CE | 0.018             | -0.007 | 0.045  | 0.212         | 0.847                |
|            | LP | 0.008             | -0.022 | 0.037 | 0.639          | 0.993                |             | LP | 0.008             | -0.018 | 0.035  | 0.571         | 0.993                |
|            | RP | 0.002             | -0.031 | 0.032 | 0.927          | 0.993                |             | RP | 0.011             | -0.019 | 0.037  | 0.519         | 0.993                |
| Low Alpha  | LA | 0.039             | 0.002  | 0.075 | <b>0.034*</b>  | 0.543                | High Beta   | LA | 0.041             | -0.009 | 0.108  | 0.122         | 0.765                |
|            | RA | 0.043             | 0.004  | 0.082 | <b>0.028*</b>  | 0.543                |             | RA | -0.005            | -0.035 | 0.023  | 0.789         | 0.993                |
|            | LM | 0.030             | -0.014 | 0.073 | 0.178          | 0.797                |             | LM | 0.001             | -0.039 | 0.040  | 0.973         | 0.993                |
|            | RM | 0.029             | -0.011 | 0.066 | 0.164          | 0.765                |             | RM | 0.021             | -0.004 | 0.044  | 0.098         | 0.765                |
|            | CE | 0.039             | -0.007 | 0.085 | 0.088          | 0.765                |             | CE | 0.022             | -0.003 | 0.050  | 0.070         | 0.765                |
|            | LP | 0.042             | -0.013 | 0.101 | 0.152          | 0.765                |             | LP | 0.009             | -0.016 | 0.032  | 0.494         | 0.993                |
|            | RP | 0.032             | -0.023 | 0.087 | 0.274          | 0.958                |             | RP | 0.029             | -0.004 | 0.058  | 0.078         | 0.765                |
| High Alpha | LA | 0.035             | -0.006 | 0.074 | 0.098          | 0.765                | Gamma       | LA | -0.018            | -0.083 | 0.059  | 0.581         | 0.993                |
|            | RA | 0.042             | 0.001  | 0.081 | <b>0.050*</b>  | 0.699                |             | RA | -0.048            | -0.098 | -0.008 | <b>0.020*</b> | 0.543                |
|            | LM | 0.028             | -0.021 | 0.073 | 0.262          | 0.958                |             | LM | -0.010            | -0.077 | 0.051  | 0.725         | 0.993                |
|            | RM | 0.040             | -0.006 | 0.082 | 0.082          | 0.765                |             | RM | 0.030             | -0.028 | 0.087  | 0.320         | 0.993                |
|            | CE | 0.063             | 0.006  | 0.116 | <b>0.026*</b>  | 0.543                |             | CE | 0.026             | -0.029 | 0.103  | 0.464         | 0.993                |
|            | LP | 0.068             | 0.017  | 0.119 | <b>0.006**</b> | 0.336                |             | LP | -0.011            | -0.056 | 0.033  | 0.659         | 0.993                |
|            | RP | 0.080             | 0.025  | 0.133 | <b>0.004**</b> | 0.336                |             | RP | 0.025             | -0.030 | 0.080  | 0.376         | 0.993                |

M<sub>Diff</sub> – factor score mean difference; CI – 95% confidential interval; L – lower bound; U – upper bound; LA – left anterior; RA – right anterior; LM – left middle; RM – right middle; CE – central; LP – left posterior; RP – right posterior; LA – left anterior; RA – right anterior; \* p < 0.05; \*\* p < 0.01.

S4 Table continuation

|            |    | LD                |        |        |               |                          |             |    |                   |        |       |         |                          |
|------------|----|-------------------|--------|--------|---------------|--------------------------|-------------|----|-------------------|--------|-------|---------|--------------------------|
|            |    | M <sub>Diff</sub> | CI     |        | p-value       | FDR-adjusted<br>p -value |             |    | M <sub>Diff</sub> | CI     |       | p-value | FDR-adjusted<br>p -value |
|            |    |                   | L      | U      |               |                          |             |    |                   | L      | U     |         |                          |
| Delta      | LA | -0.037            | -0.072 | -0.003 | <b>0.032*</b> | 0.543                    | Low Beta    | LA | 0.007             | -0.028 | 0.042 | 0.715   | 0.993                    |
|            | RA | -0.027            | -0.060 | 0.005  | 0.104         | 0.765                    |             | RA | -0.002            | -0.033 | 0.033 | 0.917   | 0.993                    |
|            | LM | -0.021            | -0.057 | 0.009  | 0.198         | 0.821                    |             | LM | 0.002             | -0.030 | 0.037 | 0.903   | 0.993                    |
|            | RM | 0.002             | -0.032 | 0.039  | 0.881         | 0.993                    |             | RM | -0.005            | -0.036 | 0.029 | 0.787   | 0.993                    |
|            | CE | 0.004             | -0.020 | 0.029  | 0.739         | 0.993                    |             | CE | -0.011            | -0.051 | 0.028 | 0.575   | 0.993                    |
|            | LP | -0.001            | -0.031 | 0.030  | 0.915         | 0.993                    |             | LP | 0.008             | -0.034 | 0.057 | 0.725   | 0.993                    |
|            | RP | 0.015             | -0.017 | 0.052  | 0.364         | 0.993                    |             | RP | 0.001             | -0.046 | 0.051 | 0.993   | 0.993                    |
| Theta      | LA | -0.007            | -0.037 | 0.023  | 0.559         | 0.993                    | Middle Beta | LA | 0.009             | -0.030 | 0.050 | 0.689   | 0.993                    |
|            | RA | -0.007            | -0.034 | 0.024  | 0.573         | 0.993                    |             | RA | 0.000             | -0.035 | 0.037 | 0.949   | 0.993                    |
|            | LM | 0.002             | -0.027 | 0.033  | 0.893         | 0.993                    |             | LM | 0.005             | -0.032 | 0.043 | 0.781   | 0.993                    |
|            | RM | 0.003             | -0.027 | 0.034  | 0.853         | 0.993                    |             | RM | 0.000             | -0.035 | 0.036 | 0.967   | 0.993                    |
|            | CE | 0.003             | -0.028 | 0.037  | 0.893         | 0.993                    |             | CE | -0.006            | -0.037 | 0.023 | 0.639   | 0.993                    |
|            | LP | -0.003            | -0.039 | 0.033  | 0.891         | 0.993                    |             | LP | 0.003             | -0.026 | 0.037 | 0.869   | 0.993                    |
|            | RP | 0.000             | -0.034 | 0.034  | 0.985         | 0.993                    |             | RP | 0.004             | -0.032 | 0.042 | 0.785   | 0.993                    |
| Low Alpha  | LA | -0.001            | -0.062 | 0.056  | 0.983         | 0.993                    | High Beta   | LA | 0.013             | -0.027 | 0.051 | 0.500   | 0.993                    |
|            | RA | -0.008            | -0.063 | 0.043  | 0.773         | 0.993                    |             | RA | -0.008            | -0.042 | 0.033 | 0.659   | 0.993                    |
|            | LM | 0.008             | -0.048 | 0.059  | 0.707         | 0.993                    |             | LM | 0.042             | -0.009 | 0.091 | 0.128   | 0.765                    |
|            | RM | 0.005             | -0.043 | 0.053  | 0.775         | 0.993                    |             | RM | -0.017            | -0.063 | 0.034 | 0.480   | 0.993                    |
|            | CE | -0.009            | -0.070 | 0.051  | 0.757         | 0.993                    |             | CE | 0.003             | -0.028 | 0.033 | 0.827   | 0.993                    |
|            | LP | -0.003            | -0.072 | 0.059  | 0.949         | 0.993                    |             | LP | 0.028             | -0.011 | 0.074 | 0.158   | 0.765                    |
|            | RP | -0.007            | -0.070 | 0.062  | 0.853         | 0.993                    |             | RP | 0.000             | -0.049 | 0.049 | 0.945   | 0.993                    |
| High Alpha | LA | 0.020             | -0.048 | 0.093  | 0.601         | 0.993                    | Gamma       | LA | -0.018            | -0.054 | 0.082 | 0.691   | 0.993                    |
|            | RA | 0.020             | -0.043 | 0.087  | 0.559         | 0.993                    |             | RA | -0.048            | -0.100 | 0.011 | 0.130   | 0.765                    |
|            | LM | 0.020             | -0.042 | 0.086  | 0.541         | 0.993                    |             | LM | -0.010            | -0.048 | 0.145 | 0.310   | 0.993                    |
|            | RM | 0.016             | -0.044 | 0.077  | 0.577         | 0.993                    |             | RM | 0.030             | -0.078 | 0.072 | 0.927   | 0.993                    |
|            | CE | 0.007             | -0.064 | 0.080  | 0.845         | 0.993                    |             | CE | 0.026             | -0.044 | 0.035 | 0.823   | 0.993                    |
|            | LP | 0.021             | -0.061 | 0.106  | 0.617         | 0.993                    |             | LP | -0.011            | -0.054 | 0.073 | 0.801   | 0.993                    |
|            | RP | 0.006             | -0.079 | 0.094  | 0.879         | 0.993                    |             | RP | 0.025             | -0.086 | 0.053 | 0.681   | 0.993                    |

M<sub>Diff</sub> – factor score mean difference; CI – 95% confidential interval; L – lower bound; U – upper bound; LA – left anterior; RA – right anterior; LM – left middle; RM – right middle; CE – central; LP – left posterior; RP – right posterior; LA – left anterior; RA – right anterior; \* p < 0.05; \*\* p < 0.01.
