# Supplementary material for: Electrophysiological correlates of focused attention on low- and high-distressed tinnitus
Source: PubMed Central journal article supplement (PMC7406215; doi:10.1371/journal.pone.0236521), 2020-08-05
Supplement: pone.0236521.s005.pdf [file pone.0236521.s005.pdf]

S5 Table. The mean absolute power and standard error (in brackets) values for different frequency bands in the contrast: high tinnitus-related distress (HD) versus low tinnitus-related distress (LD) group, calculated in each cluster separately for the body focus condition (BFC) and tinnitus focus condition (TFC).

|            |    | BFC           |               | TFC           |               |             |    | BFC                  |                      | TFC                  |                      |
|------------|----|---------------|---------------|---------------|---------------|-------------|----|----------------------|----------------------|----------------------|----------------------|
|            |    | HD            | LD            | HD            | LD            |             |    | HD                   | LD                   | HD                   | LD                   |
| Delta      | LA | 0.975 (0.025) | 0.954 (0.026) | 0.968 (0.030) | 0.976 (0.031) | Low Beta    | LA | 0.412 (0.040)        | 0.312 (0.041)        | 0.401 (0.039)        | 0.305 (0.040)        |
|            | RA | 0.958 (0.028) | 0.971 (0.029) | 0.970 (0.029) | 0.998 (0.030) |             | RA | 0.408 (0.042)        | 0.320 (0.043)        | 0.402 (0.041)        | 0.322 (0.042)        |
|            | LM | 0.910 (0.024) | 0.854 (0.025) | 0.911 (0.024) | 0.875 (0.025) |             | LM | <b>0.538 (0.045)</b> | <b>0.395 (0.046)</b> | <b>0.539 (0.044)</b> | <b>0.392 (0.044)</b> |
|            | RM | 0.900 (0.027) | 0.897 (0.027) | 0.913 (0.026) | 0.895 (0.027) |             | RM | 0.526 (0.046)        | 0.401 (0.047)        | 0.506 (0.046)        | 0.405 (0.047)        |
|            | CE | 1.071 (0.025) | 1.039 (0.025) | 1.065 (0.025) | 1.035 (0.025) |             | CE | 0.654 (0.048)        | 0.526 (0.049)        | 0.634 (0.046)        | 0.537 (0.047)        |
|            | LP | 0.948 (0.028) | 0.893 (0.028) | 0.957 (0.028) | 0.894 (0.028) |             | LP | <b>0.707 (0.055)</b> | <b>0.549 (0.056)</b> | 0.683 (0.053)        | 0.541 (0.054)        |
|            | RP | 0.921 (0.030) | 0.905 (0.031) | 0.936 (0.030) | 0.889 (0.030) |             | RP | 0.692 (0.057)        | 0.563 (0.058)        | 0.672 (0.056)        | 0.563 (0.057)        |
| Theta      | LA | 0.809 (0.032) | 0.763 (0.033) | 0.793 (0.034) | 0.761 (0.692) | Middle Beta | LA | 0.323 (0.039)        | 0.209 (0.040)        | 0.288 (0.039)        | 0.204 (0.039)        |
|            | RA | 0.819 (0.033) | 0.782 (0.034) | 0.806 (0.035) | 0.788 (0.718) |             | RA | 0.295 (0.041)        | 0.211 (0.041)        | 0.298 (0.040)        | 0.211 (0.040)        |
|            | LM | 0.792 (0.032) | 0.709 (0.033) | 0.781 (0.033) | 0.706 (0.640) |             | LM | 0.421 (0.045)        | 0.308 (0.046)        | 0.395 (0.046)        | 0.303 (0.046)        |
|            | RM | 0.781 (0.034) | 0.743 (0.034) | 0.778 (0.035) | 0.741 (0.669) |             | RM | 0.400 (0.047)        | 0.301 (0.048)        | 0.389 (0.048)        | 0.300 (0.049)        |
|            | CE | 0.999 (0.034) | 0.939 (0.034) | 0.988 (0.034) | 0.936 (0.866) |             | CE | <b>0.501 (0.046)</b> | <b>0.371 (0.047)</b> | 0.484 (0.045)        | 0.377 (0.046)        |
|            | LP | 0.850 (0.037) | 0.755 (0.038) | 0.842 (0.037) | 0.758 (0.684) |             | LP | <b>0.484 (0.047)</b> | <b>0.329 (0.048)</b> | <b>0.476 (0.047)</b> | <b>0.326 (0.047)</b> |
|            | RP | 0.813 (0.039) | 0.750 (0.040) | 0.811 (0.039) | 0.750 (0.670) |             | RP | 0.456 (0.049)        | 0.333 (0.049)        | 0.445 (0.047)        | 0.329 (0.048)        |
| Low Alpha  | LA | 0.734 (0.065) | 0.619 (0.066) | 0.686 (0.068) | 0.614 (0.069) | High Beta   | LA | 0.547 (0.040)        | 0.470 (0.041)        | 0.505 (0.037)        | 0.457 (0.037)        |
|            | RA | 0.752 (0.068) | 0.652 (0.069) | 0.709 (0.070) | 0.660 (0.071) |             | RA | 0.501 (0.037)        | 0.455 (0.038)        | 0.505 (0.036)        | 0.462 (0.037)        |
|            | LM | 0.729 (0.070) | 0.601 (0.071) | 0.699 (0.070) | 0.593 (0.072) |             | LM | 0.604 (0.043)        | 0.554 (0.043)        | 0.603 (0.043)        | 0.512 (0.044)        |
|            | RM | 0.735 (0.072) | 0.640 (0.073) | 0.707 (0.073) | 0.634 (0.074) |             | RM | 0.575 (0.039)        | 0.518 (0.040)        | 0.554 (0.041)        | 0.535 (0.042)        |
|            | CE | 0.957 (0.073) | 0.835 (0.074) | 0.918 (0.073) | 0.844 (0.074) |             | CE | <b>0.691 (0.038)</b> | <b>0.576 (0.039)</b> | 0.668 (0.035)        | 0.572 (0.036)        |
|            | LP | 0.941 (0.077) | 0.744 (0.079) | 0.899 (0.080) | 0.747 (0.081) |             | LP | <b>0.656 (0.039)</b> | <b>0.528 (0.040)</b> | <b>0.647 (0.037)</b> | <b>0.500 (0.038)</b> |
|            | RP | 0.909 (0.082) | 0.767 (0.083) | 0.877 (0.085) | 0.774 (0.086) |             | RP | 0.636 (0.041)        | 0.525 (0.041)        | 0.607 (0.040)        | 0.525 (0.040)        |
| High Alpha | LA | 0.599 (0.061) | 0.513 (0.062) | 0.558 (0.057) | 0.489 (0.058) | Gamma       | LA | 0.254 (0.055)        | 0.310 (0.056)        | 0.272 (0.050)        | 0.296 (0.051)        |
|            | RA | 0.613 (0.064) | 0.533 (0.065) | 0.570 (0.060) | 0.512 (0.061) |             | RA | 0.198 (0.047)        | 0.248 (0.047)        | 0.245 (0.048)        | 0.293 (0.049)        |
|            | LM | 0.686 (0.064) | 0.559 (0.065) | 0.658 (0.061) | 0.539 (0.062) |             | LM | 0.307 (0.058)        | 0.363 (0.059)        | 0.317 (0.063)        | 0.312 (0.064)        |
|            | RM | 0.684 (0.068) | 0.568 (0.069) | 0.644 (0.065) | 0.553 (0.066) |             | RM | 0.286 (0.051)        | 0.304 (0.051)        | 0.256 (0.055)        | 0.309 (0.056)        |
|            | CE | 0.935 (0.074) | 0.772 (0.075) | 0.872 (0.069) | 0.766 (0.070) |             | CE | 0.258 (0.044)        | 0.270 (0.045)        | 0.232 (0.046)        | 0.274 (0.047)        |
|            | LP | 1.070 (0.086) | 0.853 (0.087) | 1.001 (0.082) | 0.832 (0.083) |             | LP | 0.214 (0.036)        | 0.213 (0.036)        | 0.225 (0.037)        | 0.204 (0.038)        |
|            | RP | 1.073 (0.091) | 0.888 (0.092) | 0.993 (0.086) | 0.882 (0.087) |             | RP | 0.214 (0.039)        | 0.225 (0.040)        | 0.189 (0.044)        | 0.240 (0.044)        |

LA – left anterior; RA – right anterior; LM – left middle; RM – right middle; CE – central; LP – left posterior; RP – right posterior. Items in bold are significant based on p-values.
