# Supplementary material for: Electrophysiological correlates of focused attention on low- and high-distressed tinnitus
Source: PubMed Central journal article supplement (PMC7406215; doi:10.1371/journal.pone.0236521), 2020-08-05
Supplement: pone.0236521.s006.pdf [file pone.0236521.s006.pdf]

S6 Table. Post-hoc pairwise t-tests results for the contrast: high tinnitus-related distress (HD) versus low tinnitus-related distress (LD) group, calculated in each cluster separately for the body focus condition (BFC) and tinnitus focus condition (TFC). Items in bold are significant based on p-values.

| BFC        |    |                   |        |       |         |                      |             |    |                   |        |       |               |                      |
|------------|----|-------------------|--------|-------|---------|----------------------|-------------|----|-------------------|--------|-------|---------------|----------------------|
|            |    | M <sub>Diff</sub> | CI     |       | p-value | FDR-adjusted p-value |             |    | M <sub>Diff</sub> | CI     |       | p-value       | FDR-adjusted p-value |
|            |    |                   | L      | U     |         |                      |             |    |                   | L      | U     |               |                      |
| Delta      | LA | 0.007             | -0.070 | 0.082 | 0.837   | 0.876                | Low Beta    | LA | 0.088             | -0.023 | 0.199 | 0.119         | 0.394                |
|            | RA | -0.014            | -0.093 | 0.065 | 0.733   | 0.797                |             | RA | 0.087             | -0.030 | 0.204 | 0.143         | 0.394                |
|            | LM | 0.056             | -0.013 | 0.124 | 0.108   | 0.394                |             | LM | 0.143             | 0.017  | 0.268 | <b>0.026*</b> | 0.394                |
|            | RM | 0.004             | -0.071 | 0.077 | 0.910   | 0.926                |             | RM | 0.125             | -0.005 | 0.255 | 0.059         | 0.394                |
|            | CE | 0.032             | -0.036 | 0.101 | 0.354   | 0.551                |             | CE | 0.128             | -0.007 | 0.263 | 0.062         | 0.394                |
|            | LP | 0.056             | -0.022 | 0.133 | 0.157   | 0.394                |             | LP | 0.158             | 0.003  | 0.310 | <b>0.045*</b> | 0.394                |
|            | RP | 0.016             | -0.069 | 0.100 | 0.698   | 0.790                |             | RP | 0.129             | -0.030 | 0.287 | 0.112         | 0.394                |
| Theta      | LA | 0.048             | -0.044 | 0.140 | 0.305   | 0.510                | Middle Beta | LA | 0.091             | -0.017 | 0.198 | 0.098         | 0.394                |
|            | RA | 0.037             | -0.055 | 0.129 | 0.428   | 0.580                |             | RA | 0.084             | -0.028 | 0.197 | 0.143         | 0.394                |
|            | LM | 0.084             | -0.005 | 0.173 | 0.066   | 0.394                |             | LM | 0.113             | -0.012 | 0.239 | 0.077         | 0.394                |
|            | RM | 0.037             | -0.057 | 0.132 | 0.435   | 0.580                |             | RM | 0.099             | -0.032 | 0.230 | 0.140         | 0.394                |
|            | CE | 0.060             | -0.034 | 0.154 | 0.211   | 0.445                |             | CE | 0.131             | 0.001  | 0.259 | <b>0.048*</b> | 0.394                |
|            | LP | 0.095             | -0.008 | 0.197 | 0.071   | 0.394                |             | LP | 0.155             | 0.023  | 0.286 | <b>0.022*</b> | 0.394                |
|            | RP | 0.063             | -0.044 | 0.171 | 0.248   | 0.479                |             | RP | 0.123             | -0.012 | 0.256 | 0.075         | 0.394                |
| Low Alpha  | LA | 0.112             | -0.071 | 0.294 | 0.228   | 0.455                | High Beta   | LA | 0.077             | -0.030 | 0.189 | 0.166         | 0.394                |
|            | RA | 0.100             | -0.088 | 0.288 | 0.297   | 0.510                |             | RA | 0.046             | -0.055 | 0.150 | 0.383         | 0.567                |
|            | LM | 0.128             | -0.068 | 0.322 | 0.198   | 0.426                |             | LM | 0.050             | -0.069 | 0.167 | 0.402         | 0.567                |
|            | RM | 0.096             | -0.102 | 0.294 | 0.346   | 0.551                |             | RM | 0.057             | -0.050 | 0.167 | 0.302         | 0.510                |
|            | CE | 0.122             | -0.079 | 0.322 | 0.237   | 0.465                |             | CE | 0.115             | 0.011  | 0.221 | <b>0.029*</b> | 0.394                |
|            | LP | 0.197             | -0.017 | 0.411 | 0.071   | 0.394                |             | LP | 0.128             | 0.019  | 0.236 | <b>0.021*</b> | 0.394                |
|            | RP | 0.141             | -0.082 | 0.367 | 0.219   | 0.455                |             | RP | 0.111             | -0.001 | 0.224 | 0.053         | 0.394                |
| High Alpha | LA | 0.083             | -0.088 | 0.252 | 0.336   | 0.545                | Gamma       | LA | -0.056            | -0.204 | 0.099 | 0.467         | 0.595                |
|            | RA | 0.080             | -0.098 | 0.255 | 0.376   | 0.567                |             | RA | -0.051            | -0.176 | 0.081 | 0.433         | 0.580                |
|            | LM | 0.126             | -0.053 | 0.304 | 0.166   | 0.394                |             | LM | -0.056            | -0.217 | 0.102 | 0.487         | 0.595                |
|            | RM | 0.116             | -0.072 | 0.302 | 0.227   | 0.455                |             | RM | -0.018            | -0.158 | 0.122 | 0.797         | 0.850                |
|            | CE | 0.162             | -0.043 | 0.366 | 0.120   | 0.394                |             | CE | -0.012            | -0.135 | 0.111 | 0.845         | 0.876                |
|            | LP | 0.217             | -0.023 | 0.451 | 0.075   | 0.394                |             | LP | 0.001             | -0.097 | 0.101 | 0.985         | 0.985                |
|            | RP | 0.185             | -0.068 | 0.434 | 0.151   | 0.394                |             | RP | -0.012            | -0.121 | 0.097 | 0.833         | 0.876                |

M<sub>Diff</sub> – factor score mean difference; CI – 95% confidential interval; L – lower bound; U – upper bound; LA – left anterior; RA – right anterior; LM – left middle; RM – right middle; CE – central; LP – left posterior; RP – right posterior; LA – left anterior; RA – right anterior; \* p < 0.05; \*\* p < 0.01.

S6 Table continuation

|            |    | TFC               |        |       |         |                          |             |    |                   |        |        |                |                          |
|------------|----|-------------------|--------|-------|---------|--------------------------|-------------|----|-------------------|--------|--------|----------------|--------------------------|
|            |    | M <sub>Diff</sub> | CI     |       | p-value | FDR-adjusted<br>p -value |             |    | M <sub>Diff</sub> | CI     |        | p-value        | FDR-adjusted<br>p -value |
|            |    |                   | L      | U     |         |                          |             |    |                   | L      | U      |                |                          |
| Delta      | LA | -0.008            | -0.092 | 0.075 | 0.867   | 0.891                    | Low Beta    | LA | 0.096             | 0.055  | -0.013 | 0.083          | 0.394                    |
|            | RA | -0.028            | -0.110 | 0.052 | 0.497   | 0.595                    |             | RA | 0.080             | 0.058  | -0.035 | 0.170          | 0.394                    |
|            | LM | 0.036             | -0.031 | 0.105 | 0.293   | 0.510                    |             | LM | 0.147             | 0.062  | 0.024  | <b>0.019*</b>  | 0.394                    |
|            | RM | 0.018             | -0.055 | 0.089 | 0.623   | 0.712                    |             | RM | 0.101             | 0.066  | -0.029 | 0.129          | 0.394                    |
|            | CE | 0.030             | -0.038 | 0.099 | 0.385   | 0.567                    |             | CE | 0.097             | 0.066  | -0.033 | 0.142          | 0.394                    |
|            | LP | 0.063             | -0.012 | 0.140 | 0.101   | 0.394                    |             | LP | 0.142             | 0.076  | -0.008 | 0.064          | 0.394                    |
|            | RP | 0.047             | -0.036 | 0.130 | 0.268   | 0.500                    |             | RP | 0.109             | 0.080  | -0.048 | 0.173          | 0.394                    |
| Theta      | LA | 0.032             | -0.062 | 0.127 | 0.512   | 0.603                    | Middle Beta | LA | 0.085             | -0.022 | 0.192  | 0.121          | 0.394                    |
|            | RA | 0.018             | -0.077 | 0.114 | 0.719   | 0.794                    |             | RA | 0.086             | -0.024 | 0.197  | 0.123          | 0.394                    |
|            | LM | 0.074             | -0.015 | 0.167 | 0.106   | 0.394                    |             | LM | 0.092             | -0.035 | 0.220  | 0.156          | 0.394                    |
|            | RM | 0.037             | -0.059 | 0.135 | 0.450   | 0.593                    |             | RM | 0.089             | -0.043 | 0.222  | 0.189          | 0.415                    |
|            | CE | 0.052             | -0.042 | 0.149 | 0.284   | 0.510                    |             | CE | 0.107             | -0.020 | 0.232  | 0.098          | 0.394                    |
|            | LP | 0.084             | -0.016 | 0.186 | 0.100   | 0.394                    |             | LP | 0.150             | 0.020  | 0.278  | <b>0.025*</b>  | 0.394                    |
|            | RP | 0.061             | -0.046 | 0.170 | 0.270   | 0.500                    |             | RP | 0.116             | -0.015 | 0.245  | 0.082          | 0.394                    |
| Low Alpha  | LA | 0.072             | -0.116 | 0.260 | 0.457   | 0.595                    | High Beta   | LA | 0.048             | -0.053 | 0.151  | 0.358          | 0.551                    |
|            | RA | 0.050             | -0.142 | 0.243 | 0.617   | 0.712                    |             | RA | 0.043             | -0.057 | 0.145  | 0.410          | 0.567                    |
|            | LM | 0.106             | -0.090 | 0.301 | 0.291   | 0.510                    |             | LM | 0.091             | -0.028 | 0.211  | 0.135          | 0.394                    |
|            | RM | 0.073             | -0.129 | 0.276 | 0.487   | 0.595                    |             | RM | 0.018             | -0.095 | 0.134  | 0.755          | 0.813                    |
|            | CE | 0.074             | -0.127 | 0.277 | 0.479   | 0.595                    |             | CE | 0.096             | -0.001 | 0.195  | 0.052          | 0.394                    |
|            | LP | 0.152             | -0.068 | 0.373 | 0.179   | 0.401                    |             | LP | 0.148             | 0.045  | 0.250  | <b>0.005**</b> | 0.394                    |
|            | RP | 0.103             | -0.130 | 0.338 | 0.396   | 0.567                    |             | RP | 0.082             | -0.027 | 0.193  | 0.141          | 0.394                    |
| High Alpha | LA | 0.068             | -0.089 | 0.226 | 0.395   | 0.567                    | Gamma       | LA | -0.024            | -0.161 | 0.115  | 0.723          | 0.794                    |
|            | RA | 0.058             | -0.107 | 0.223 | 0.493   | 0.595                    |             | RA | -0.047            | -0.177 | 0.088  | 0.477          | 0.595                    |
|            | LM | 0.119             | -0.049 | 0.287 | 0.168   | 0.394                    |             | LM | 0.004             | -0.167 | 0.178  | 0.972          | 0.981                    |
|            | RM | 0.091             | -0.088 | 0.270 | 0.318   | 0.523                    |             | RM | -0.053            | -0.208 | 0.100  | 0.499          | 0.595                    |
|            | CE | 0.106             | -0.083 | 0.297 | 0.273   | 0.500                    |             | CE | -0.042            | -0.174 | 0.084  | 0.526          | 0.614                    |
|            | LP | 0.169             | -0.060 | 0.394 | 0.145   | 0.394                    |             | LP | 0.021             | -0.082 | 0.125  | 0.708          | 0.793                    |
|            | RP | 0.111             | -0.126 | 0.347 | 0.359   | 0.551                    |             | RP | -0.051            | -0.174 | 0.069  | 0.407          | 0.567                    |

M<sub>Diff</sub> – factor score mean difference; CI – 95% confidential interval; L – lower bound; U – upper bound; LA – left anterior; RA – right anterior; LM – left middle; RM – right middle; CE – central; LP – left posterior; RP – right posterior; LA – left anterior; RA – right anterior; \* p < 0.05; \*\* p < 0.01.
